# Supplementary material for: CSSSCL: a python package that uses combined sequence similarity scores for accurate taxonomic classification of long and short sequence reads
Source: PubMed Central journal article supplement (PMC4734043; doi:10.1093/bioinformatics/btv587), 2015-10-09
Supplement: supp_btv587_supplementary_data.pdf [file supp_btv587_supplementary_data.pdf]

Supplementary Data - CSSSCL: a python package that uses  
Combined Sequence Similarity Scores for accurate taxonomic  
Classification of long and short sequence reads.

Ivan Borozan and Vincent Ferretti

June 2015

## 0.1 Set of parameters used to run different models/algorithms

### CSSSCL :

#### Viral:

---

To build the database:

```
>cssscl build_dbs -btax -c -blast -nt 16 /train_test_viral_full_data/TRAIN.fa /taxon/
```

To classify:

```
>cssscl classify -c -blast blastn -tax genus -nt 16 /train_test_viral_full_data/TEST_full.fa /train_test_viral_full_data,
```

#### Bacterial I:

---

To build the database:

```
>cssscl build_dbs -btax -blast -nt 16 -kmin 4 /bacterial1/TRAIN.fa /taxon/
```

To classify:

```
>cssscl classify -blast megablast -num_alignments 1 -nt 16 -tax genus /bacterial1/TEST.fa /bacterial1/
```

#### Bacterial II:

---

To build the database:

```
>cssscl build_dbs -btax -blast -nt 16 -kmeroff /bacterial2/bacterial_genomes.fna /taxon/
```

To classify:

```
>cssscl classify -blast blastn -num_alignments 1 -kmeroff -nt 16 -tax genus /bacterial2/MiSeq_accuracy.fa /bacterial2/
```

**Using the same datasets as above the NBC and Kraken algorithms were used with the following parameters:**

#### NBC:

To build the database:

```
>countncbi genomes_training_directory 15
```

To score:

```
>score -a TEST.fa -r 15 -j genomes_training_directory
```

#### Kraken:

To build the database:

```
>kraken-build --add-to-library TRAIN.fa --db genomeDB
```

```
>kraken-build --build --db genomeDB
```

To run Kraken:

```
>kraken --threads 16 --preload --db genomeDB TEST.fa --output results_kraken.txt
```
